# Supplementary material
Source: Springer Nature journal article supplement (https://www.springermedizin.de/resource/supplementary/13058_2012_2993_MOESM3_ESM.pdf/9703074)

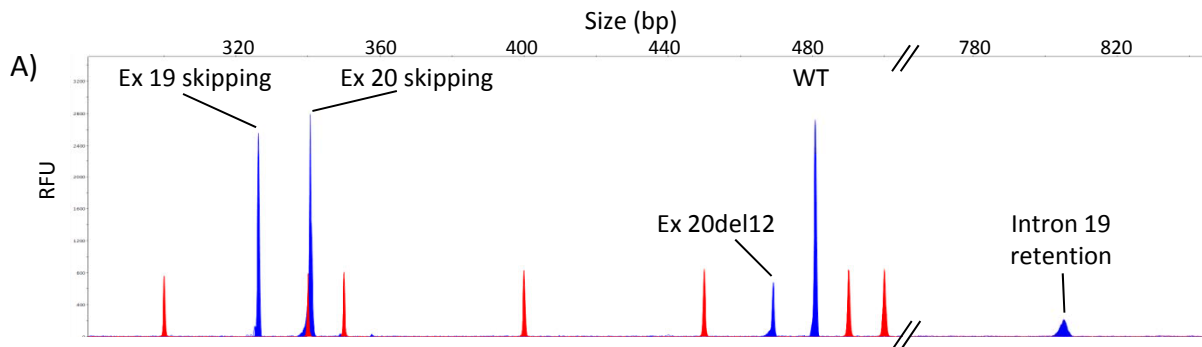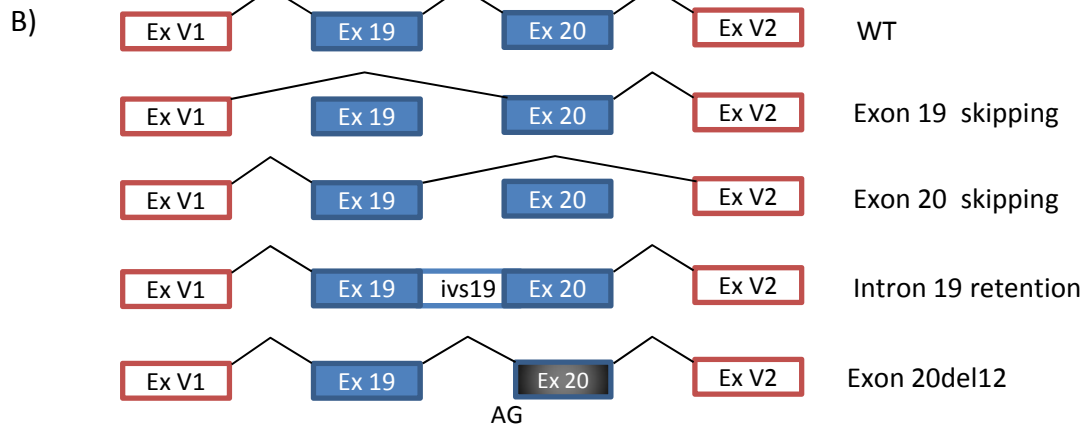

Supplement: MOESM3 [file 9703074]
